# Supplementary material for: Prevalence and characteristics of isolated nocturnal hypertension in the general population
Source: PubMed Central journal article supplement — Korean J Intern Med. 2021 Apr 5;36(5):1126–33. doi: 10.3904/kjim.2021.022 (PMC8435498; doi:10.3904/kjim.2021.022), 2021-04-05
Supplement: kjim-2021-022-suppl1.pdf [file kjim-2021-022-suppl1.pdf]

**Supplementary Table 1. Prevalence of isolated nocturnal, isolated daytime, daytime-nighttime hypertension according to the level of office blood pressure in treated individuals**

| Variable                           | Range of office BP |                 |              |
|------------------------------------|--------------------|-----------------|--------------|
|                                    | Optimal BP         | Prehypertension | Hypertension |
| Number                             | 53                 | 88              | 40           |
| DNNT                               | 30 (56.6)          | 33 (37.5)       | 4 (10.0)     |
| INUHT                              | 15 (28.3)          | 25 (28.4)       | 12 (30.0)    |
| IDUHT                              | 2 (3.8)            | 0               | 1 (2.5)      |
| DNUHT                              | 6 (11.3)           | 30 (34.1)       | 23 (57.5)    |
| Controlled hypertension            | 30 (56.6)          | 33 (37.5)       | -            |
| White-coat controlled hypertension | -                  | -               | 4 (10.0)     |
| Masked uncontrolled hypertension   | 23 (43.4)          | 55 (62.5)       | -            |
| Uncontrolled hypertension          | -                  | -               | 36 (90.0)    |

Values are presented as number (%).

BP, blood pressure; DNNT, day-night normotension; INUHT, isolated nocturnal uncontrolled hypertension; IDUHT, isolated daytime uncontrolled hypertension; DNUHT, day-night uncontrolled hypertension.
