# Supplementary material for: Prevalence and characteristics of isolated nocturnal hypertension in the general population
Source: PubMed Central journal article supplement — Korean J Intern Med. 2021 Apr 5;36(5):1126–33. doi: 10.3904/kjim.2021.022 (PMC8435498; doi:10.3904/kjim.2021.022), 2021-04-05
Supplement: kjim-2021-022-suppl2.pdf [file kjim-2021-022-suppl2.pdf]

**Supplementary Table 2. Demographic and clinical characteristics of treated individuals with sustained normotension, isolated nocturnal hypertension, isolated daytime hypertension and sustained day-night hypertension**

| Characteristic                   | DNNT                      | INUHT                      | IDUHT        | DNUHT                     | p value <sup>a</sup> |
|----------------------------------|---------------------------|----------------------------|--------------|---------------------------|----------------------|
| Number                           | 67                        | 52                         | 3            | 59                        |                      |
| Age, yr                          | 56.4 ± 7.5 <sup>b,c</sup> | 59.6 ± 7.0 <sup>c</sup>    | 50.0 ± 10.1  | 53.5 ± 8.6 <sup>b</sup>   | < 0.001              |
| BMI, kg/m <sup>2</sup>           | 25.3 ± 3.7                | 25.5 ± 3.1                 | 25.3 ± 2.5   | 26.4 ± 3.3                | 0.162                |
| Male sex                         | 19 (24.1)                 | 24 (30.4)                  | 1 (1.3)      | 35 (44.3)                 | 0.006                |
| Smoking                          | 20 (29.4)                 | 24 (35.3)                  | 1 (1.5)      | 23 (33.8)                 | 0.333                |
| Diabetes                         | 17 (50.0)                 | 8 (23.5)                   | 0 (0)        | 9 (26.5)                  | 0.324                |
| Total cholesterol, mg/dL         | 189.6 ± 36.9              | 186.0 ± 32.9               | 205.0 ± 49.9 | 187.8 ± 34.8              | 0.861                |
| LDL-C, mg/dL                     | 114.2 ± 36.0              | 113.0 ± 30.9               | 131.7 ± 45.5 | 114.9 ± 31.4              | 0.955                |
| HDL-C, mg/dL                     | 54.9 ± 13.3 <sup>b</sup>  | 52.1 ± 12.7 <sup>b,c</sup> | 45.7 ± 10.4  | 49.1 ± 13.4 <sup>c</sup>  | 0.048                |
| Triglyceride, mg/dL              | 137.1 ± 81.6              | 151.3 ± 84.6               | 175.7 ± 63.0 | 184.2 ± 196.2             | 0.129                |
| Fasting blood glucose, mg/dL     | 105.0 ± 19.1              | 108.0 ± 27.0               | 99.3 ± 10.2  | 106.5 ± 26.0              | 0.795                |
| eGFR, mL/min/1.73 m <sup>2</sup> | 91.0 ± 18.1               | 86.5 ± 18.5                | 92.5 ± 30.4  | 89.5 ± 13.3               | 0.341                |
| Serum creatinine, mg/dL          | 0.8 ± 0.2                 | 0.8 ± 0.2                  | 0.8 ± 0.4    | 0.8 ± 0.2                 | 0.045                |
| Office SBP, mmHg                 | 117.2 ± 11.0 <sup>b</sup> | 123.6 ± 13.4 <sup>c</sup>  | 118.9 ± 17.1 | 129.7 ± 10.6 <sup>d</sup> | < 0.001              |
| Office DBP, mmHg                 | 72.2 ± 7.8 <sup>b</sup>   | 78.4 ± 8.5 <sup>c</sup>    | 74.1 ± 16.5  | 85.2 ± 8.0 <sup>d</sup>   | < 0.001              |
| 24-Hour SBP, mmHg                | 111.9 ± 6.7 <sup>b</sup>  | 120.1 ± 6.2 <sup>c</sup>   | 118.8 ± 7.7  | 129.6 ± 7.7 <sup>d</sup>  | < 0.001              |
| 24-Hour DBP, mmHg                | 69.5 ± 4.7 <sup>b</sup>   | 79.0 ± 4.3 <sup>c</sup>    | 76.4 ± 5.9   | 88.8 ± 5.9 <sup>d</sup>   | < 0.001              |
| Daytime SBP, mmHg                | 115.8 ± 7.5 <sup>b</sup>  | 120.2 ± 6.4 <sup>c</sup>   | 127.2 ± 8.3  | 132.9 ± 8.7 <sup>d</sup>  | < 0.001              |
| Daytime DBP, mmHg                | 72.7 ± 5.9 <sup>b</sup>   | 78.9 ± 4.7 <sup>c</sup>    | 84.9 ± 7.4   | 92.0 ± 6.8 <sup>d</sup>   | < 0.001              |
| Nighttime SBP, mmHg              | 103.6 ± 8.2 <sup>b</sup>  | 117.9 ± 8.1 <sup>c</sup>   | 106.2 ± 3.6  | 122.6 ± 10.5 <sup>d</sup> | < 0.001              |
| Nighttime DBP, mmHg              | 63.0 ± 4.7 <sup>b</sup>   | 77.2 ± 5.3 <sup>c</sup>    | 63.7 ± 4.9   | 82.2 ± 7.7 <sup>d</sup>   | < 0.001              |

Values are presented as mean ± standard deviation or number (%).

DNNT, day-night normotension; INUHT, isolated nocturnal uncontrolled hypertension; IDUHT, isolated daytime uncontrolled hypertension; DNUHT, day-night uncontrolled hypertension; BMI, body mass index; LDL-C, low-density lipoprotein cholesterol; HDL-C, high-density lipoprotein cholesterol; eGFR, estimated glomerular filtration rate; SBP, systolic blood pressure; DBP, diastolic blood pressure.

<sup>a</sup>p value from analysis of variance (ANOVA) or chi-square test.

<sup>b,c,d</sup>Different alphabets represent significant difference at alpha level 0.05.
