# Supplementary material for: Prevalence and characteristics of isolated nocturnal hypertension in the general population
Source: PubMed Central journal article supplement — Korean J Intern Med. 2021 Apr 5;36(5):1126–33. doi: 10.3904/kjim.2021.022 (PMC8435498; doi:10.3904/kjim.2021.022), 2021-04-05
Supplement: kjim-2021-022-suppl3.pdf [file kjim-2021-022-suppl3.pdf]

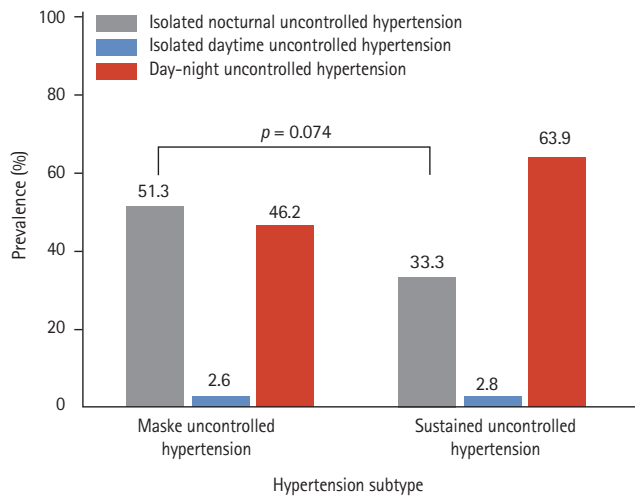

**Supplementary Figure 1.** Prevalence of isolated nighttime uncontrolled hypertension, isolated daytime uncontrolled hypertension, day-night uncontrolled hypertension in untreated individuals with masked and sustained uncontrolled hypertension. The prevalence of isolated nocturnal uncontrolled hypertension in masked uncontrolled hypertension is not different from that in sustained uncontrolled hypertension.
